# Supplementary material for: Regioselectivity of the glycosylation of N-dimethylmaleoyl-protected hexosamine acceptors. An experimental and DFT approach
Source: Royal Society of Chemistry journal article supplement (doi:10.1039/c1ob00021g), 2011-01-01
Supplement: c1ob00021g.pdf [file c1ob00021g.pdf]

## Regioselectivity of the glycosylation of *N*-dimethylmaleoyl-protected hexosamine acceptors. An experimental and DFT approach.

María I. Colombo, Edmundo A. Rúveda and Carlos A. Stortz

### Supplementary Information

NMR Spectra and Cartesian coordinates of most stable conformers

#### Index

|                                                                                                                                                                                   | <b>Page</b> |
|-----------------------------------------------------------------------------------------------------------------------------------------------------------------------------------|-------------|
| <hr/>                                                                                                                                                                             |             |
| NMR Spectra of                                                                                                                                                                    |             |
| Methyl 6- <i>O</i> -benzyl-2-deoxy-2-dimethylmaleimido- $\alpha$ -D-allopyranoside ( <b>6</b> )                                                                                   | S-2, 3      |
| Methyl 6- <i>O</i> -benzyl-2-deoxy-2-dimethylmaleimido- $\beta$ -D-allopyranoside ( <b>7</b> )                                                                                    | S-4, 5      |
| Methyl 2,3,4,6-tetra- <i>O</i> -acetyl- $\beta$ -D-galactopyranosyl-(1 $\rightarrow$ 3)-6- <i>O</i> -benzyl-2-dexoy-2-dimethylmaleimido- $\alpha$ -D-allopyranoside ( <b>8a</b> ) | S-6, 7      |
| Methyl 2,3,4,6-tetra- <i>O</i> -acetyl- $\beta$ -D-galactopyranosyl-(1 $\rightarrow$ 3)-6- <i>O</i> -benzyl-2-dexoy-2-dimethylmaleimido- $\beta$ -D-allopyranoside ( <b>10a</b> ) | S-8, 9      |
| <hr/>                                                                                                                                                                             |             |
| Coordinates of the most stable conformers of methylated                                                                                                                           |             |
| <b>6m</b> and <b>7m</b>                                                                                                                                                           | S-10,11     |
| <b>11f</b> and <b>11m</b>                                                                                                                                                         | S-11,12,13  |
| <b>12f</b> and <b>12m</b>                                                                                                                                                         | S-13,14     |
| <b>14<math>\alpha</math> E</b> and <b>14<math>\beta</math> E</b>                                                                                                                  | S-14,15     |
| <b>1e</b> and <b>2e</b>                                                                                                                                                           | S-16        |
| <hr/>                                                                                                                                                                             |             |

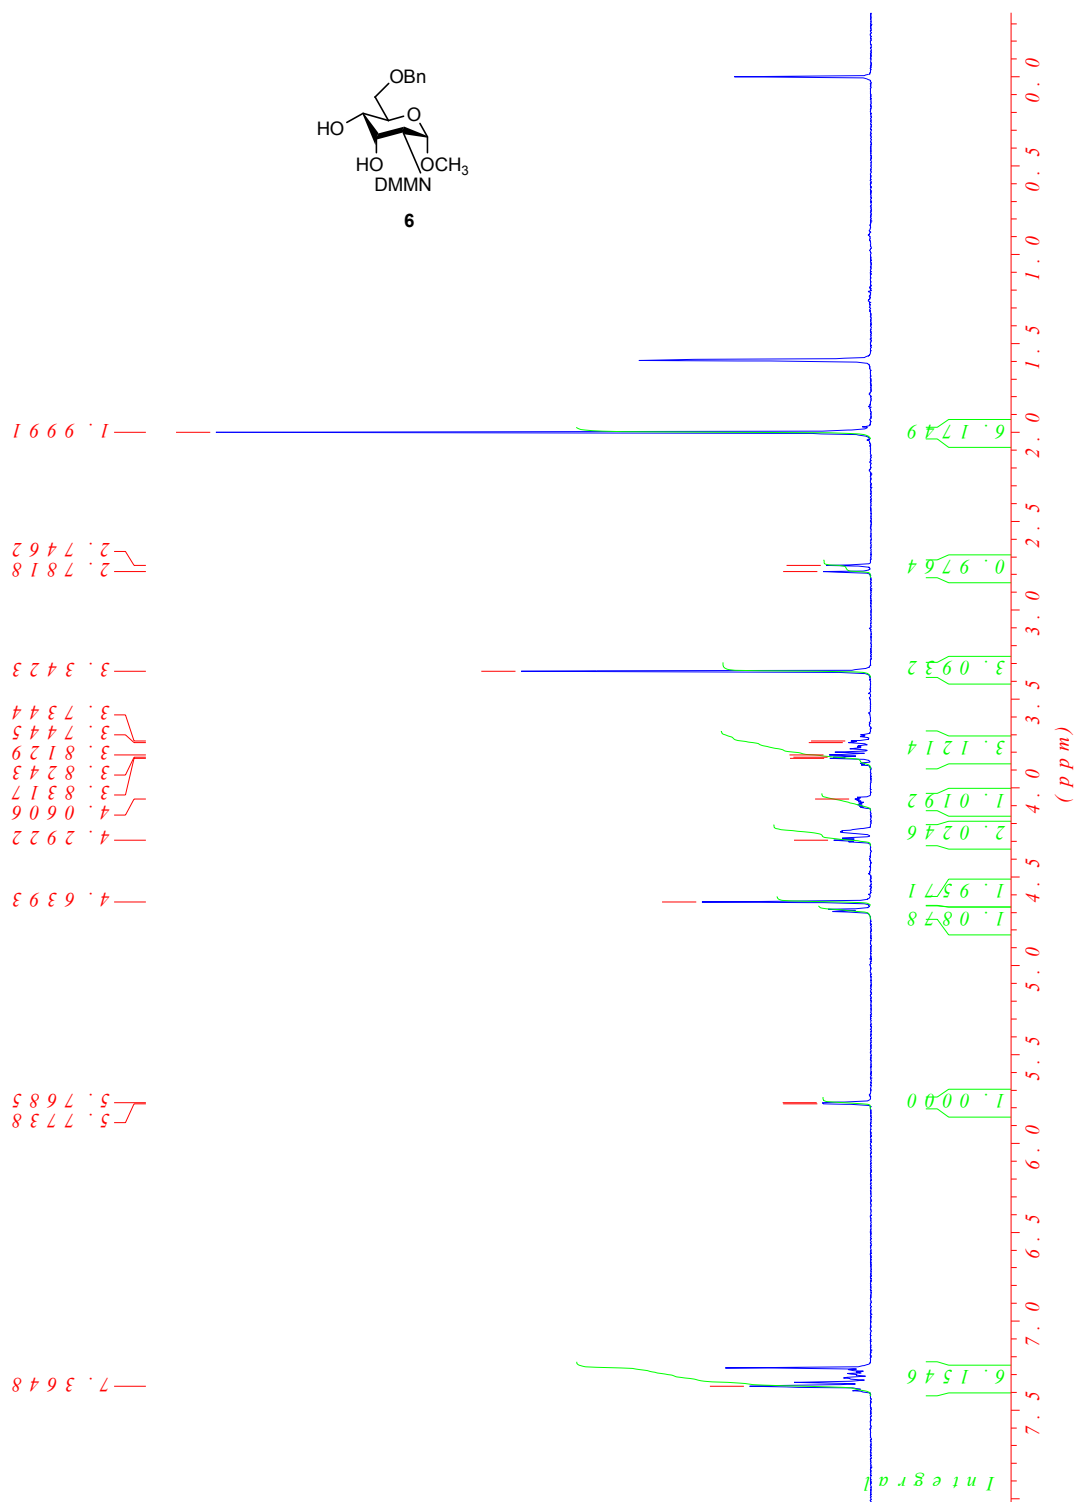

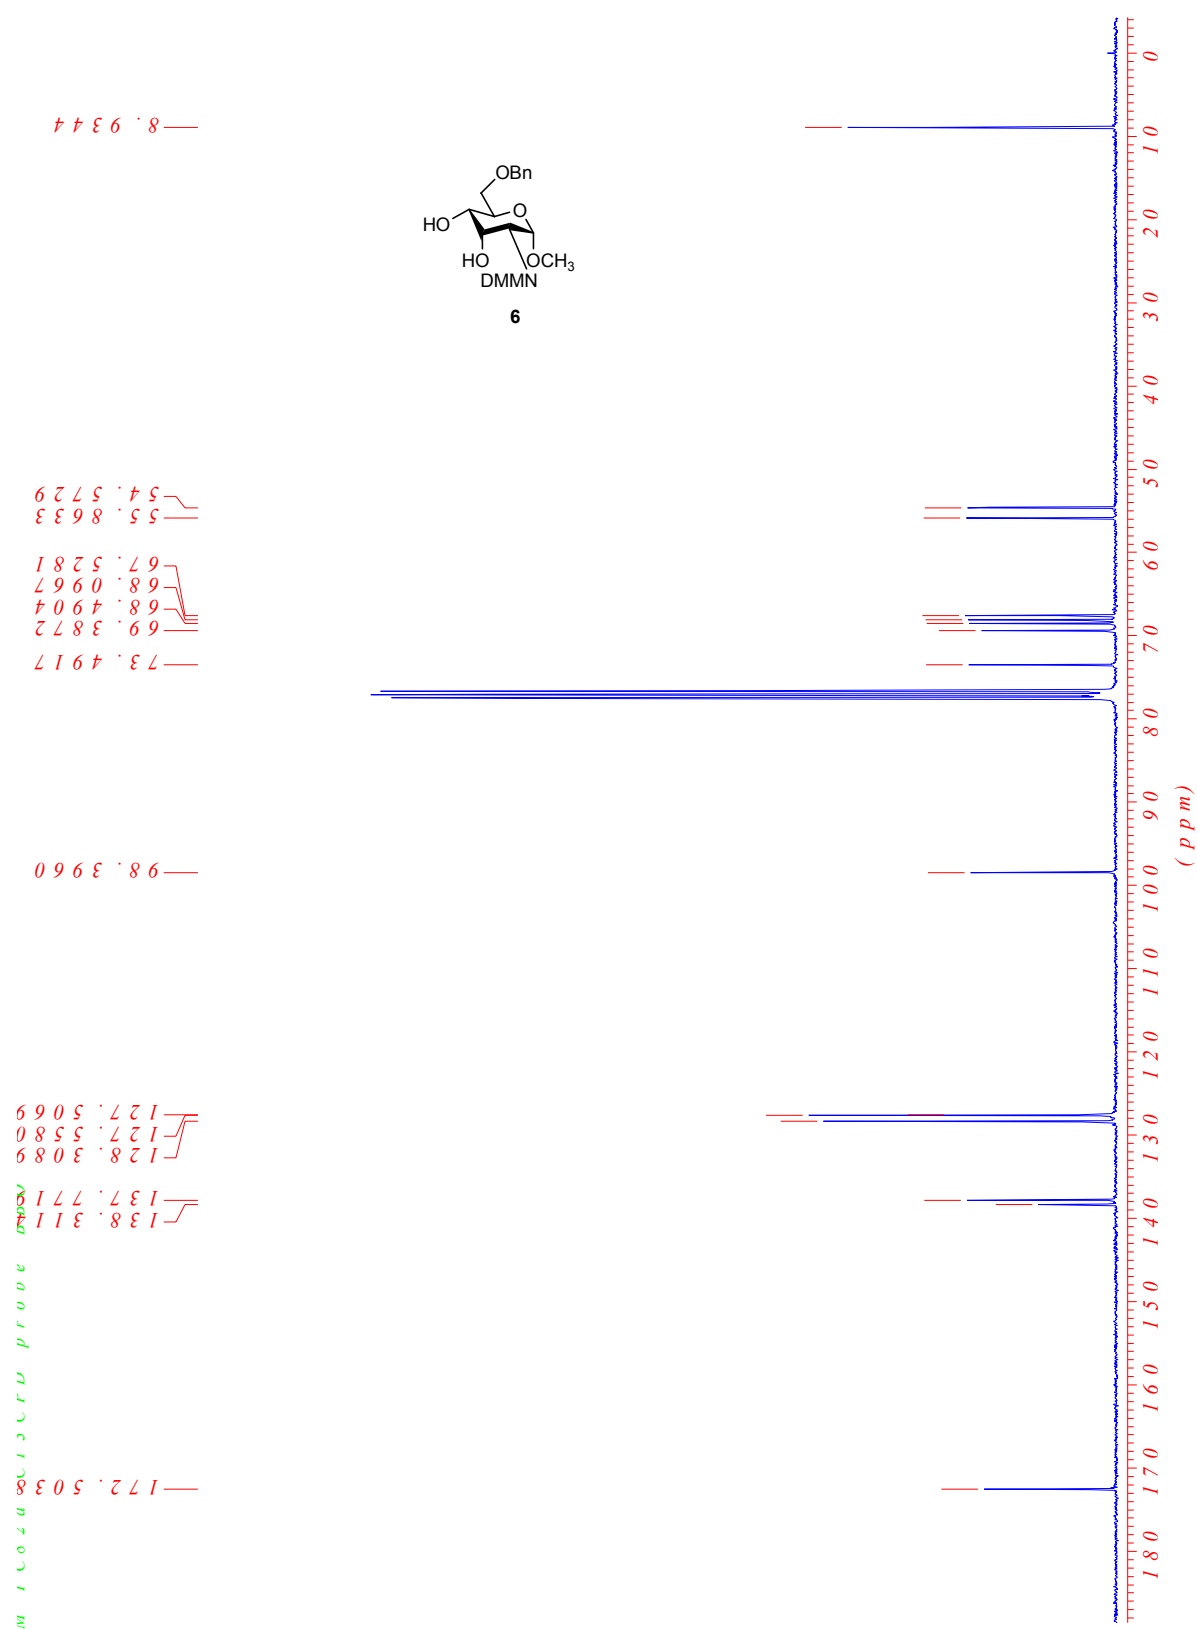

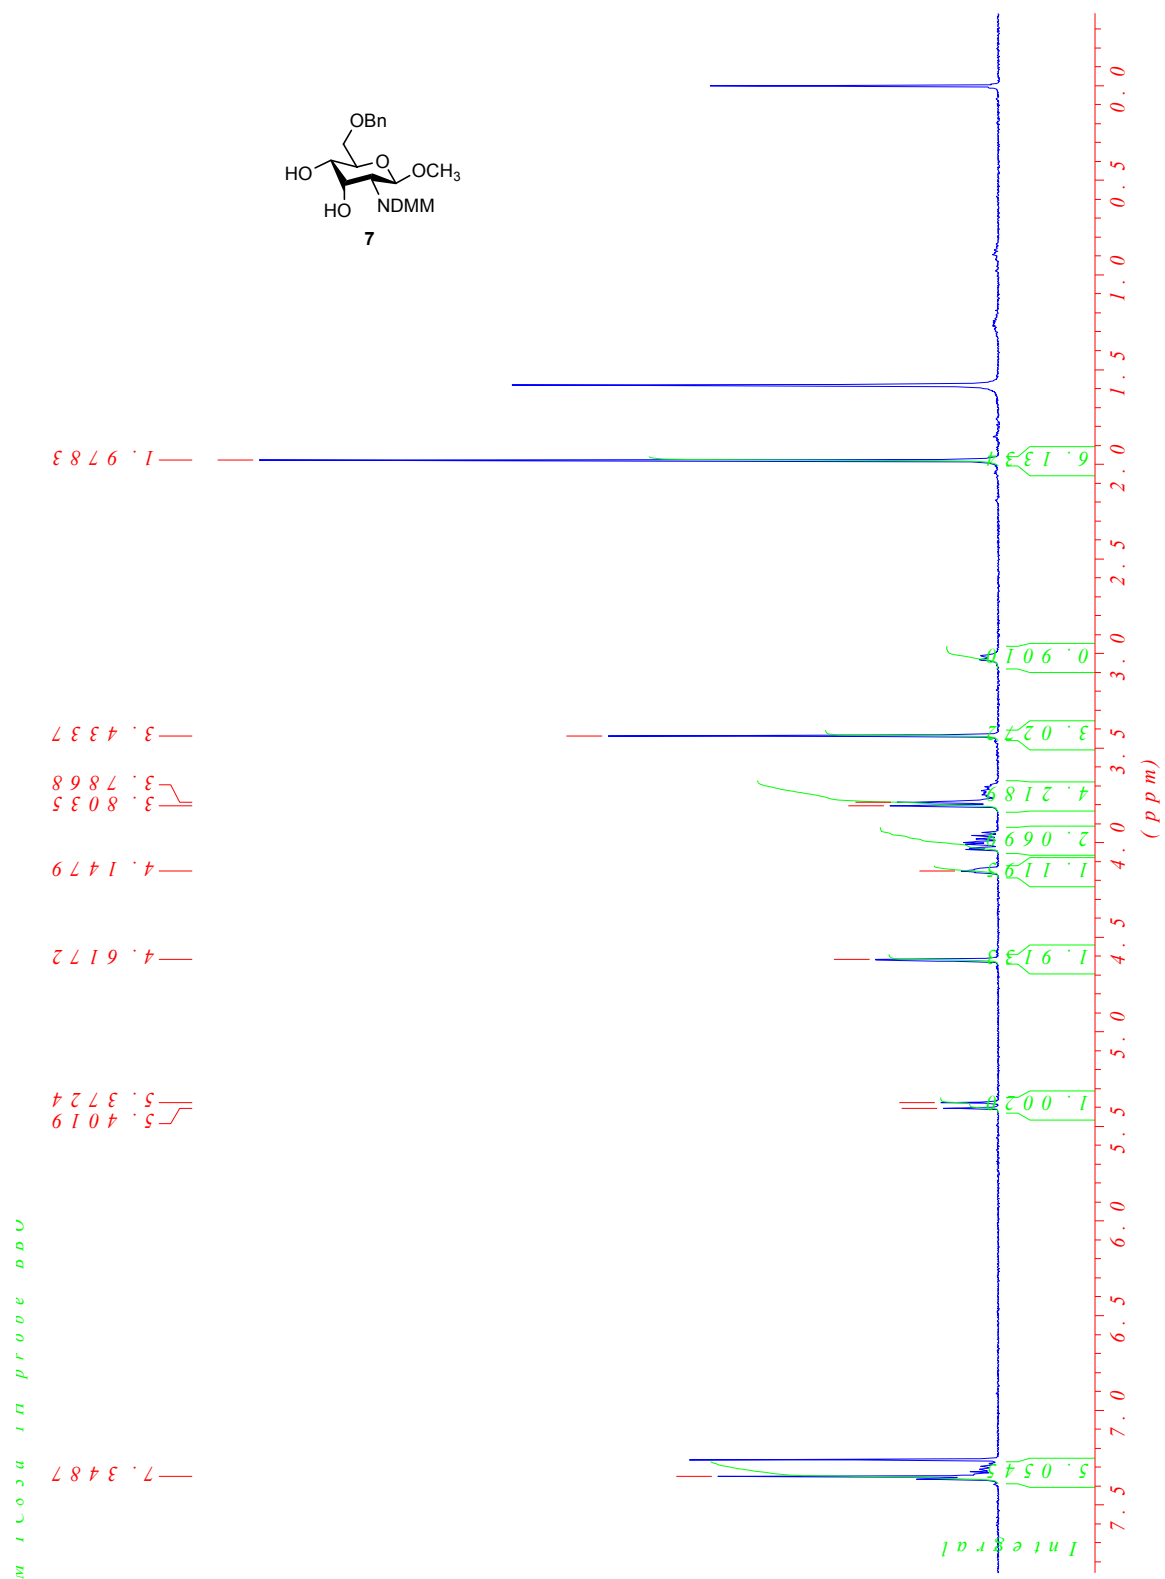

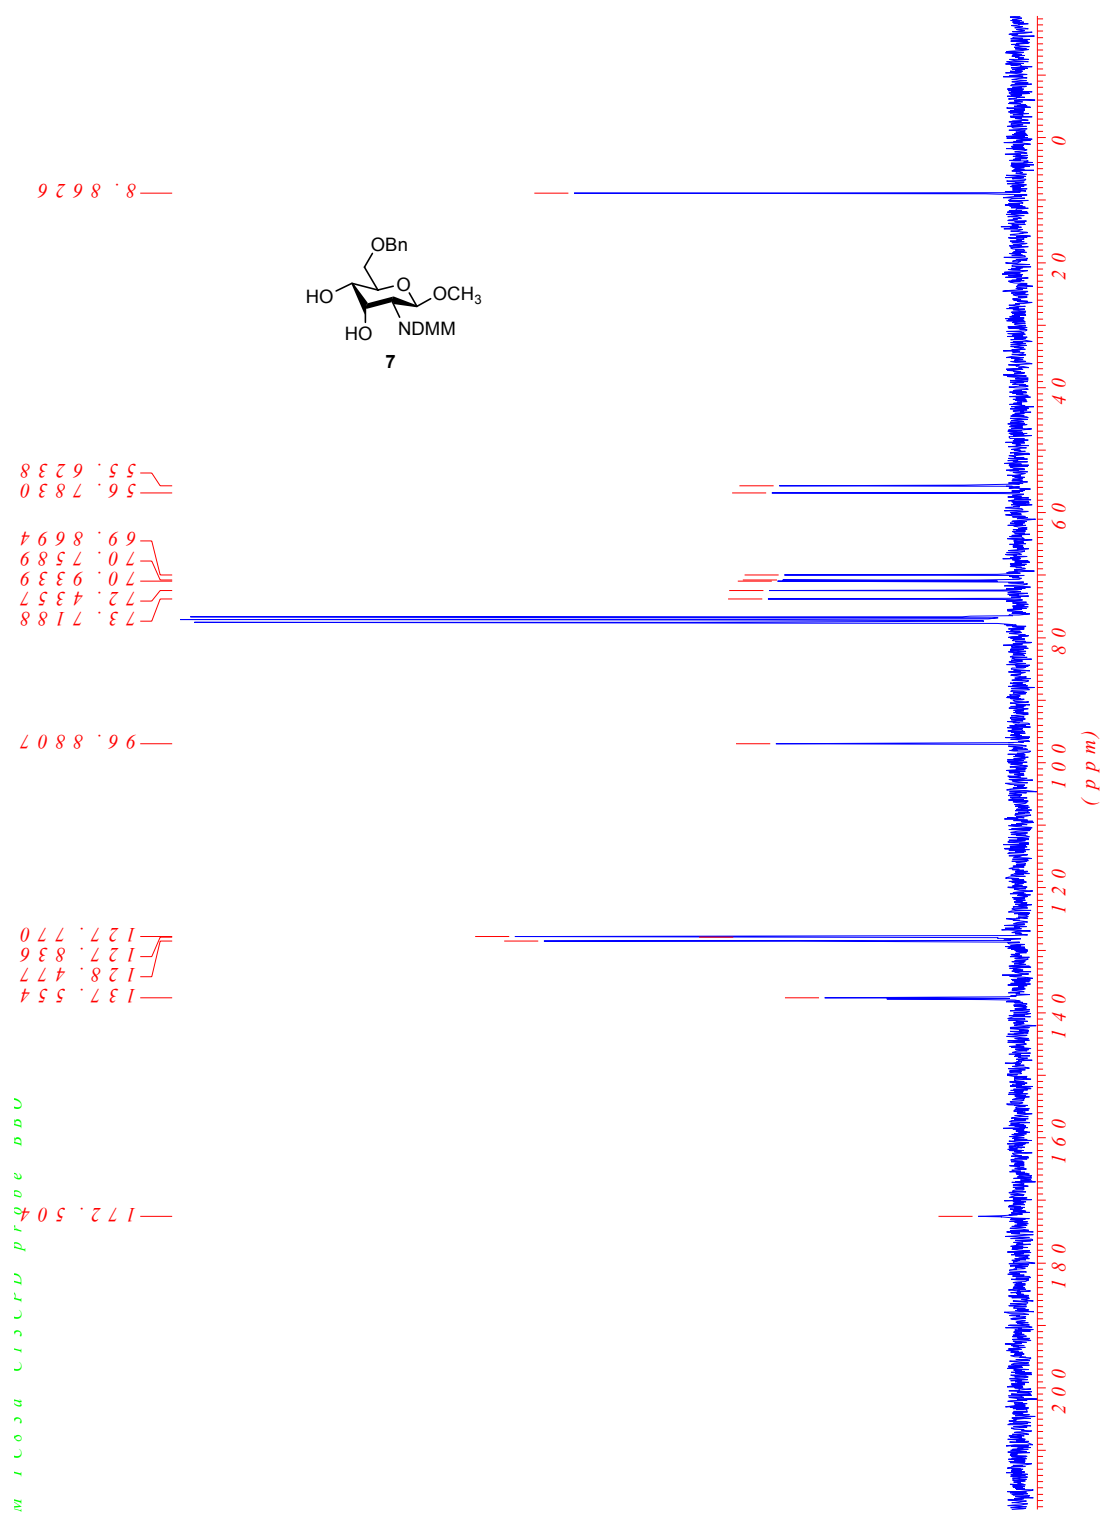

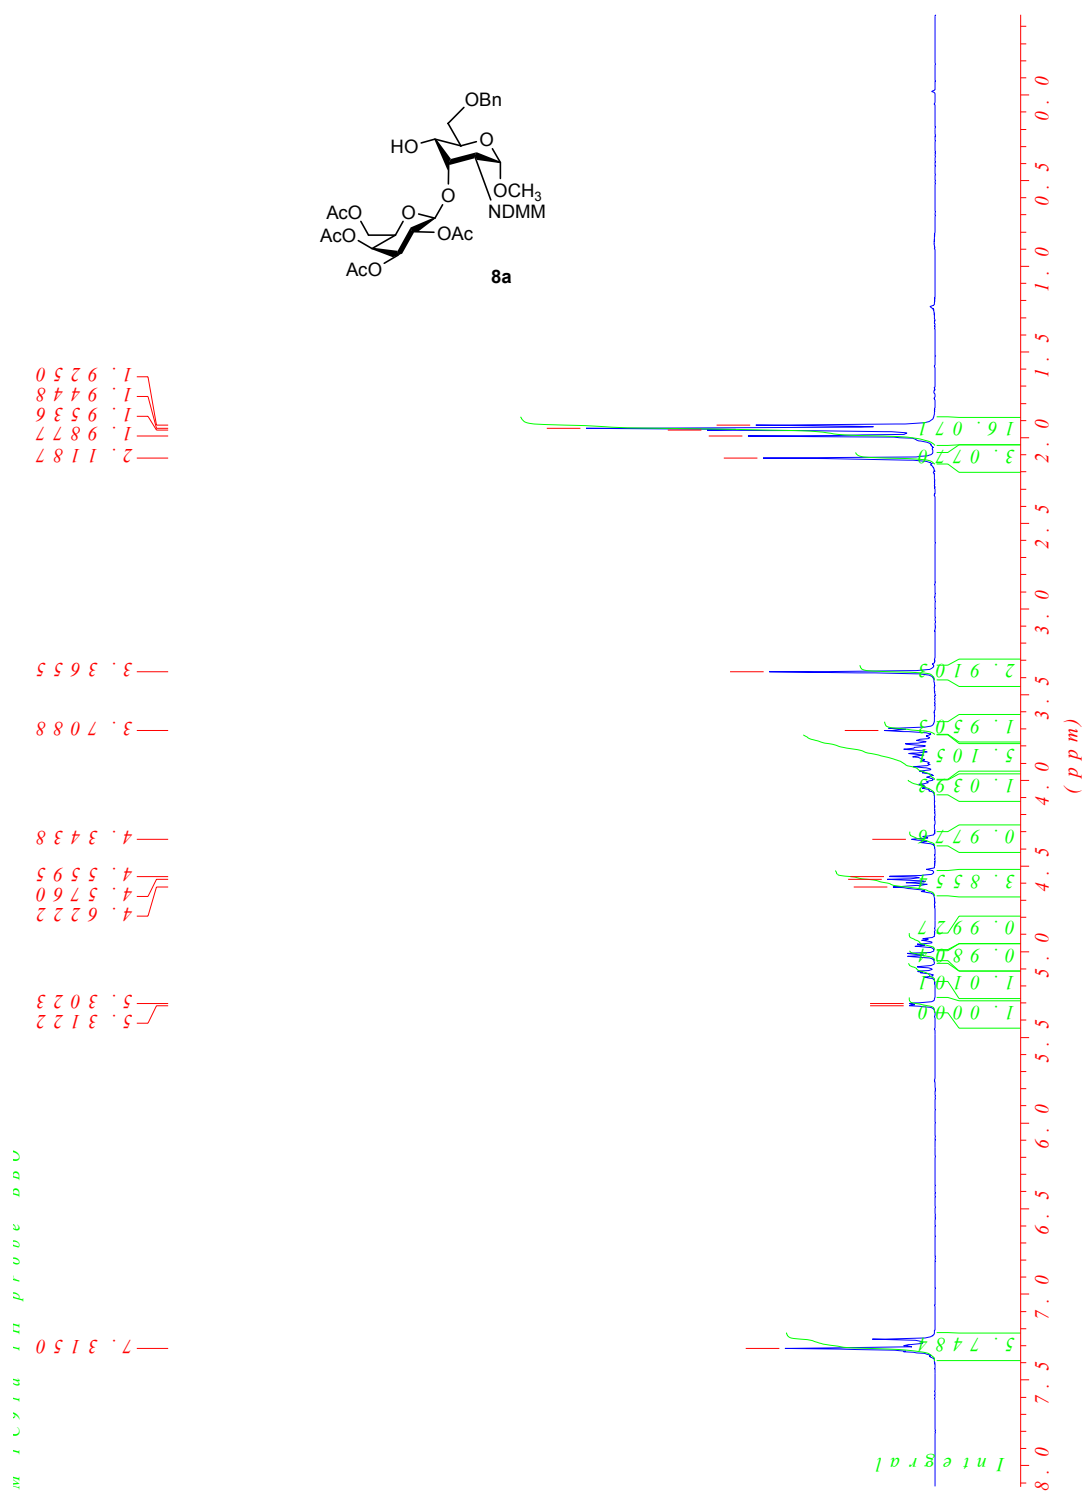



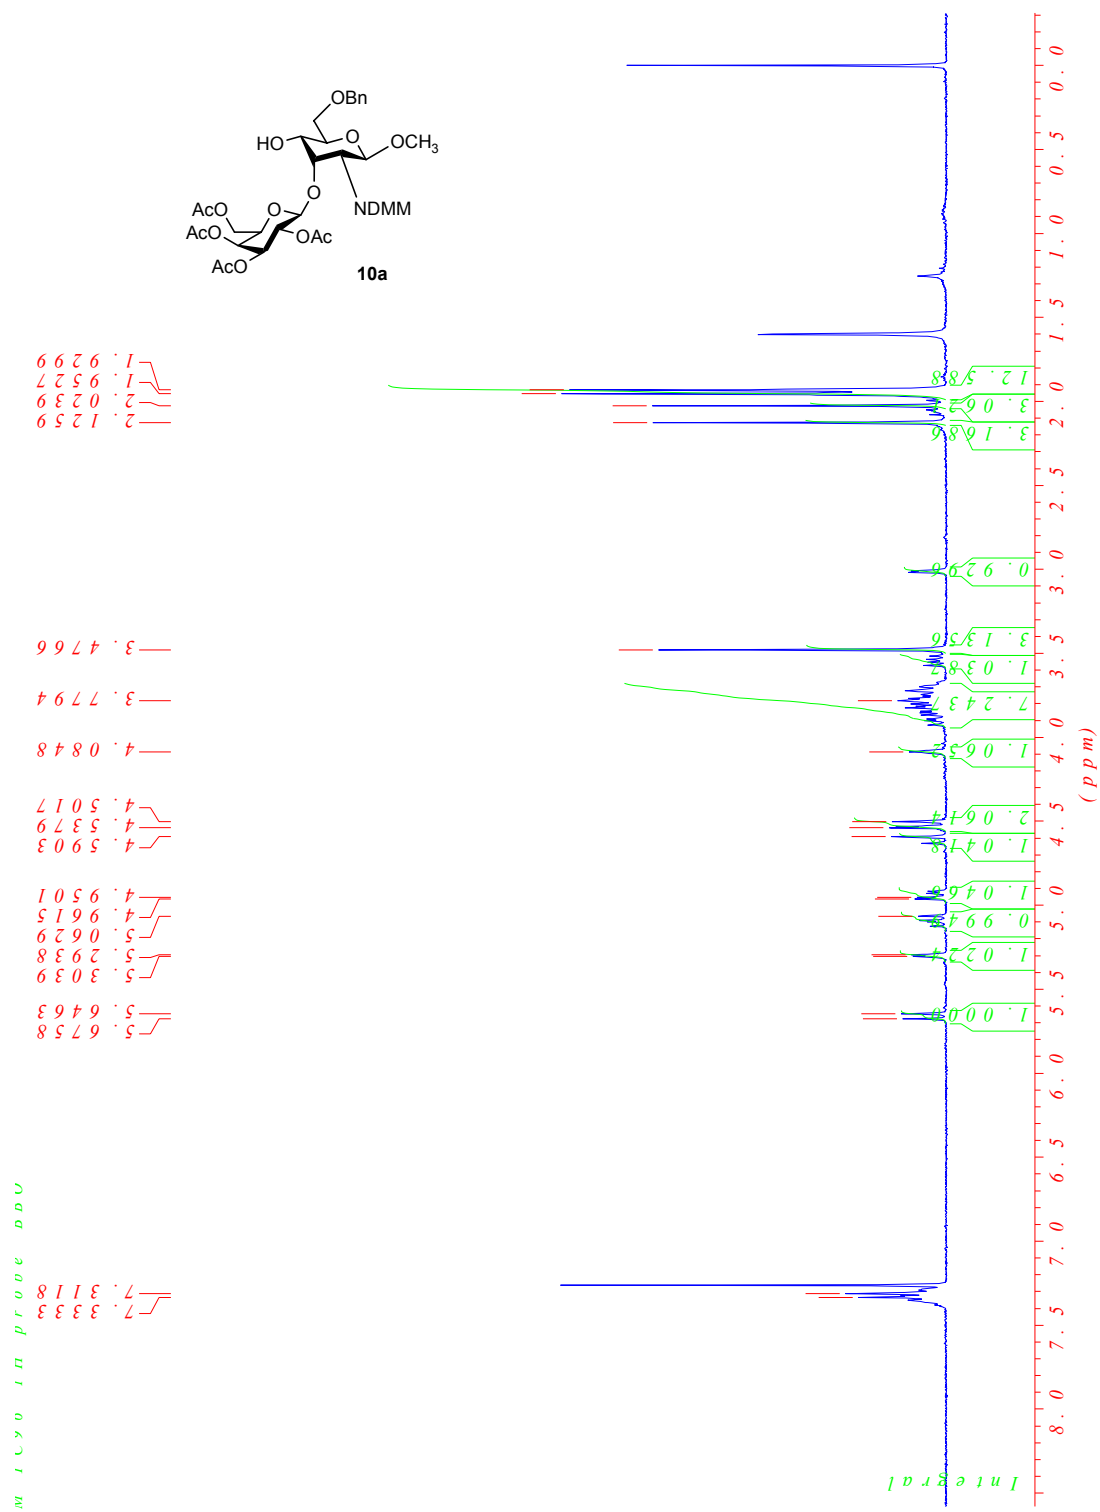





Cartesian coordinates for the different compounds, as minimized at B3LYP/6-31+G\*\* level

**Compound 6m**

Methyl 6-*O*-methyl-2-deoxy-2-dimethylmaleimido- $\alpha$ -  
D-allopyranoside

Methylated on O3

Energy = -1167.180693 Hartrees

|   |          |          |          |
|---|----------|----------|----------|
| C | 0.00000  | 0.00000  | 0.00000  |
| C | 1.55201  | 0.00000  | 0.00000  |
| C | 2.16108  | 1.41390  | 0.00000  |
| C | 1.50551  | 2.22259  | -1.13498 |
| C | -0.02788 | 2.20290  | -0.99400 |
| C | -0.74822 | 2.87597  | -2.16373 |
| O | -0.48428 | 0.83731  | -1.02133 |
| O | -0.43024 | 0.35238  | 1.28380  |
| N | 2.08509  | -0.90758 | 1.03100  |
| O | 1.94336  | 2.05317  | 1.29295  |
| O | 2.04854  | 3.52395  | -1.11070 |
| O | -0.31516 | 4.22881  | -2.22963 |
| C | 2.14486  | -0.75637 | 2.37441  |
| C | 2.48327  | -2.03861 | 3.03920  |
| C | 2.62132  | -2.96992 | 2.06704  |
| C | 2.34975  | -2.30134 | 0.74963  |
| O | 1.98512  | 0.33354  | 2.99482  |
| O | 2.33108  | -2.76530 | -0.36015 |
| C | -1.83978 | 0.17819  | 1.50793  |
| C | 2.63813  | -2.12774 | 4.52077  |
| C | 2.97519  | -4.41336 | 2.12885  |
| C | -0.95001 | 4.98488  | -3.26463 |
| C | 2.89246  | 3.10301  | 1.66631  |
| H | -0.36915 | -0.99835 | -0.27228 |
| H | 1.85415  | -0.46184 | -0.94455 |
| H | 3.24370  | 1.35578  | -0.16676 |
| H | 1.76241  | 1.70940  | -2.07768 |
| H | -0.31478 | 2.68461  | -0.05213 |
| H | -1.83344 | 2.82213  | -2.00082 |
| H | -0.51448 | 2.34621  | -3.09982 |
| H | 1.45029  | 4.10185  | -1.62407 |
| H | -2.01744 | 0.43768  | 2.55152  |
| H | -2.13085 | -0.86460 | 1.33045  |
| H | -2.42357 | 0.83561  | 0.85779  |
| H | 2.88811  | -3.14343 | 4.82965  |
| H | 1.71446  | -1.82670 | 5.02679  |
| H | 3.42780  | -1.45376 | 4.87085  |
| H | 3.11799  | -4.75079 | 3.15615  |
| H | 3.89414  | -4.60601 | 1.56327  |
| H | 2.19062  | -5.01917 | 1.66175  |
| H | -2.03531 | 5.01413  | -3.10730 |
| H | -0.54782 | 5.99697  | -3.20794 |
| H | -0.73400 | 4.55670  | -4.25181 |
| H | 2.60014  | 3.41483  | 2.66935  |
| H | 2.80679  | 3.92231  | 0.95810  |
| H | 3.90886  | 2.69607  | 1.67261  |
| H | 1.86586  | 1.16646  | 2.27446  |

Methylated on O4

Energy = -1167.166925 Hartrees

|   |          |         |          |
|---|----------|---------|----------|
| C | 0.00000  | 0.00000 | 0.00000  |
| C | 1.54610  | 0.00000 | 0.00000  |
| C | 2.16770  | 1.42523 | 0.00000  |
| C | 1.51826  | 2.16530 | -1.17660 |
| C | -0.01443 | 2.16854 | -1.04313 |
| C | -0.70844 | 2.88851 | -2.20215 |

|   |          |          |          |
|---|----------|----------|----------|
| O | -0.46114 | 0.82203  | -1.09083 |
| O | -0.47798 | 0.40899  | 1.23253  |
| N | 2.10639  | -0.90682 | 0.99599  |
| O | 1.94975  | 2.22577  | 1.12764  |
| O | 1.91095  | 3.59835  | -1.16612 |
| O | -0.12119 | 4.20898  | -2.29226 |
| C | 2.32461  | -0.73058 | 2.36549  |
| C | 2.71170  | -2.06110 | 2.94051  |
| C | 2.72292  | -2.97066 | 1.94321  |
| C | 2.32251  | -2.27379 | 0.67943  |
| O | 2.25657  | 0.32680  | 2.97724  |
| O | 2.18563  | -2.73927 | -0.43292 |
| C | -1.86449 | 0.11924  | 1.47018  |
| C | 3.02574  | -2.19076 | 4.39271  |
| C | 3.04986  | -4.42537 | 1.93984  |
| C | -0.61944 | 5.04363  | -3.35950 |
| C | 3.31804  | 3.97308  | -1.31163 |
| H | -0.37108 | -0.99689 | -0.26917 |
| H | 1.82505  | -0.45819 | -0.95655 |
| H | 3.24571  | 1.29353  | -0.19536 |
| H | 1.83204  | 1.74867  | -2.14094 |
| H | -0.27262 | 2.63913  | -0.08723 |
| H | -1.78157 | 2.98070  | -2.01048 |
| H | -0.55170 | 2.34801  | -3.14402 |
| H | 2.01740  | 1.67433  | 1.94205  |
| H | 1.17283  | 4.09565  | -1.75178 |
| H | -2.07072 | 0.43811  | 2.49176  |
| H | -2.05434 | -0.95688 | 1.37371  |
| H | -2.50778 | 0.66765  | 0.77451  |
| H | 3.29008  | -3.21633 | 4.65535  |
| H | 2.16890  | -1.88160 | 5.00133  |
| H | 3.85734  | -1.53252 | 4.66760  |
| H | 3.30228  | -4.78325 | 2.93931  |
| H | 3.89366  | -4.62875 | 1.27101  |
| H | 2.20380  | -5.00872 | 1.56011  |
| H | -1.69418 | 5.19232  | -3.22572 |
| H | -0.10362 | 6.00018  | -3.27752 |
| H | -0.41665 | 4.58177  | -4.33100 |
| H | 3.32961  | 5.05764  | -1.40799 |
| H | 3.74050  | 3.49069  | -2.19577 |
| H | 3.82219  | 3.67038  | -0.39574 |

**Compound 7m**

Methyl 6-*O*-methyl-2-deoxy-2-dimethylmaleimido- $\beta$ -  
D-allopyranoside

Methylated on O3

Energy = -1167.178051 Hartrees

|   |          |          |          |
|---|----------|----------|----------|
| C | 0.00000  | 0.00000  | 0.00000  |
| C | 1.55109  | 0.00000  | 0.00000  |
| C | 2.08915  | 1.43814  | 0.00000  |
| C | 1.47824  | 2.19269  | -1.19558 |
| C | -0.06172 | 2.07147  | -1.19849 |
| C | -0.70045 | 2.62488  | -2.47356 |
| O | -0.42629 | 0.68516  | -1.16516 |
| O | -0.41193 | -1.31599 | -0.04305 |
| N | 2.10934  | -0.86226 | 1.05333  |
| O | 1.71815  | 2.05801  | 1.27110  |
| O | 1.92388  | 3.52986  | -1.14173 |
| O | -0.31217 | 3.98557  | -2.60842 |
| C | 1.98901  | -0.74511 | 2.38826  |
| C | 2.35703  | -1.99884 | 3.08064  |
| C | 2.69838  | -2.89332 | 2.12269  |

|   |          |          |          |
|---|----------|----------|----------|
| C | 2.54510  | -2.22156 | 0.78568  |
| O | 1.63225  | 0.32146  | 2.98666  |
| O | 2.74949  | -2.64461 | -0.31832 |
| C | -1.83616 | -1.50855 | 0.02801  |
| C | 2.33655  | -2.10511 | 4.56978  |
| C | 3.17764  | -4.29735 | 2.21689  |
| C | -0.87684 | 4.63139  | -3.75295 |
| C | 2.53610  | 3.18852  | 1.71123  |
| H | -0.41504 | 0.51553  | 0.88594  |
| H | 1.85561  | -0.48104 | -0.93416 |
| H | 3.18281  | 1.44773  | -0.07484 |
| H | 1.85460  | 1.68932  | -2.10243 |
| H | -0.46780 | 2.59819  | -0.32305 |
| H | -1.79314 | 2.53670  | -2.40025 |
| H | -0.36392 | 2.03556  | -3.34009 |
| H | 1.37161  | 4.04400  | -1.76238 |
| H | 1.59732  | 1.14669  | 2.27812  |
| H | -1.99106 | -2.58597 | 0.07906  |
| H | -2.32513 | -1.10418 | -0.86121 |
| H | -2.24368 | -1.03215 | 0.92901  |
| H | 2.64801  | -3.09781 | 4.89692  |
| H | 1.33176  | -1.91061 | 4.96060  |
| H | 3.00494  | -1.36498 | 5.02332  |
| H | 3.24217  | -4.63401 | 3.25213  |
| H | 4.16432  | -4.39619 | 1.74988  |
| H | 2.50569  | -4.96587 | 1.66662  |
| H | -1.97233 | 4.62610  | -3.69477 |
| H | -0.51791 | 5.66110  | -3.74339 |
| H | -0.55633 | 4.13752  | -4.67919 |
| H | 2.12718  | 3.48689  | 2.67693  |
| H | 2.45060  | 3.99046  | 0.98325  |
| H | 3.57695  | 2.86734  | 1.81899  |

#### Methylated on O4

Energy = -1167.167000 Hartrees

|   |          |          |          |
|---|----------|----------|----------|
| C | 0.00000  | 0.00000  | 0.00000  |
| C | 1.54504  | 0.00000  | 0.00000  |
| C | 2.09020  | 1.45271  | 0.00000  |
| C | 1.49191  | 2.14262  | -1.22945 |
| C | -0.04784 | 2.07128  | -1.21414 |
| C | -0.67276 | 2.68588  | -2.46951 |
| O | -0.42214 | 0.70970  | -1.19570 |
| O | -0.43535 | -1.29668 | -0.08069 |
| N | 2.13323  | -0.83481 | 1.03499  |
| O | 1.72562  | 2.23392  | 1.11305  |
| O | 1.80728  | 3.59708  | -1.22778 |
| O | -0.12474 | 4.01905  | -2.60172 |
| C | 1.99744  | -0.71585 | 2.41528  |
| C | 2.51040  | -1.97586 | 3.04074  |
| C | 2.92732  | -2.79763 | 2.05269  |
| C | 2.69135  | -2.10851 | 0.74084  |
| O | 1.55991  | 0.27464  | 2.99350  |
| O | 2.93114  | -2.50371 | -0.37832 |
| C | -1.84885 | -1.48471 | 0.09945  |
| C | 2.51794  | -2.13897 | 4.52355  |
| C | 3.53853  | -4.15645 | 2.09650  |
| C | -0.56066 | 4.76186  | -3.76019 |
| C | 3.20252  | 4.04160  | -1.27128 |
| H | -0.42368 | 0.52437  | 0.87094  |
| H | 1.84503  | -0.48405 | -0.93730 |
| H | 3.18534  | 1.39054  | -0.10032 |
| H | 1.89820  | 1.72339  | -2.15723 |
| H | -0.40286 | 2.60064  | -0.31905 |
| H | -1.76043 | 2.74737  | -2.36848 |
| H | -0.42096 | 2.09024  | -3.35576 |
| H | 1.67504  | 1.67382  | 1.92112  |
| H | 1.11383  | 4.01973  | -1.91314 |

|   |          |          |          |
|---|----------|----------|----------|
| H | -2.00850 | -2.56257 | 0.11703  |
| H | -2.40817 | -1.04222 | -0.72952 |
| H | -2.17654 | -1.04695 | 1.05069  |
| H | 2.92115  | -3.10936 | 4.81753  |
| H | 1.50400  | -2.04435 | 4.92742  |
| H | 3.11745  | -1.35283 | 4.99581  |
| H | 3.65985  | -4.51169 | 3.12109  |
| H | 4.51852  | -4.15327 | 1.60643  |
| H | 2.91798  | -4.87287 | 1.54651  |
| H | -1.64753 | 4.87491  | -3.72614 |
| H | -0.08764 | 5.74201  | -3.70192 |
| H | -0.25970 | 4.24637  | -4.67776 |
| H | 3.16704  | 5.12188  | -1.40328 |
| H | 3.72081  | 3.55515  | -2.10025 |
| H | 3.64311  | 3.79335  | -0.30767 |

#### **Compound 11f**

Methyl 6-*O*-formyl-2-deoxy-2-dimethylmaleimido- $\alpha$ -  
D-glucopyranoside

#### Methylated on O3

Energy = -1241.207106 Hartrees

|   |          |          |          |
|---|----------|----------|----------|
| C | 0.00000  | 0.00000  | 0.00000  |
| C | 1.56010  | 0.00000  | 0.00000  |
| C | 2.06273  | 1.46273  | 0.00000  |
| C | 1.44433  | 2.22639  | -1.18107 |
| C | -0.09160 | 2.10523  | -1.12187 |
| C | -0.83739 | 2.79087  | -2.25930 |
| O | -0.47547 | 0.72877  | -1.10820 |
| O | -0.40001 | 0.51690  | 1.23725  |
| N | 2.06284  | -0.83892 | 1.12950  |
| O | 3.52165  | 1.39894  | -0.07964 |
| O | 1.82806  | 3.58037  | -1.07170 |
| O | -0.46819 | 2.32012  | -3.58075 |
| C | 3.04744  | -0.63637 | 2.03250  |
| C | 3.11125  | -1.73308 | 3.03038  |
| C | 2.20711  | -2.66271 | 2.65535  |
| C | 1.53506  | -2.16632 | 1.41012  |
| O | 3.87554  | 0.32416  | 2.03400  |
| O | 0.73941  | -2.73687 | 0.71171  |
| C | -1.80072 | 0.35481  | 1.52323  |
| C | 4.08715  | -1.69763 | 4.15840  |
| C | 1.85216  | -3.98706 | 3.23260  |
| C | 0.48500  | 2.98455  | -4.24156 |
| O | 1.17783  | 3.87510  | -3.78732 |
| C | 4.31644  | 2.62187  | -0.25496 |
| H | -0.38499 | -1.00843 | -0.15758 |
| H | 1.88731  | -0.47943 | -0.92798 |
| H | 1.79494  | 1.97796  | 0.93034  |
| H | 1.81470  | 1.77478  | -2.11255 |
| H | -0.42915 | 2.60026  | -0.20032 |
| H | -0.69486 | 3.87190  | -2.20600 |
| H | -1.89848 | 2.55404  | -2.17360 |
| H | 1.69595  | 3.99217  | -1.94839 |
| H | -1.95422 | 0.74905  | 2.52781  |
| H | -2.07725 | -0.70573 | 1.49316  |
| H | -2.41514 | 0.91141  | 0.80924  |
| H | 4.02398  | -2.60567 | 4.75929  |
| H | 3.89878  | -0.83667 | 4.80943  |
| H | 5.11149  | -1.59684 | 3.78386  |
| H | 2.48179  | -4.23499 | 4.08804  |
| H | 1.95314  | -4.77294 | 2.47620  |
| H | 0.80415  | -3.99589 | 3.55401  |
| H | 0.56370  | 2.60675  | -5.26782 |
| H | 5.33622  | 2.32021  | -0.01335 |

|   |         |         |          |
|---|---------|---------|----------|
| H | 3.96157 | 3.40535 | 0.41512  |
| H | 4.24827 | 2.95004 | -1.28826 |
| H | 3.81353 | 0.87943 | 1.07339  |

Methylated on O4

Energy = -1241.199782 Hartrees

|   |          |          |          |
|---|----------|----------|----------|
| C | 0.00000  | 0.00000  | 0.00000  |
| C | 1.54627  | 0.00000  | 0.00000  |
| C | 2.10413  | 1.45038  | 0.00000  |
| C | 1.47053  | 2.17097  | -1.18754 |
| C | -0.06653 | 2.12092  | -1.09425 |
| C | -0.86222 | 2.88348  | -2.14825 |
| O | -0.45901 | 0.76099  | -1.13280 |
| O | -0.44521 | 0.52471  | 1.20773  |
| N | 2.07514  | -0.81636 | 1.09232  |
| O | 3.50399  | 1.46794  | -0.18072 |
| O | 1.81854  | 3.62814  | -1.24347 |
| O | -0.54314 | 2.55559  | -3.53667 |
| C | 2.84074  | -0.46102 | 2.20493  |
| C | 3.03203  | -1.69296 | 3.04063  |
| C | 2.44986  | -2.73119 | 2.40562  |
| C | 1.82661  | -2.20853 | 1.14579  |
| O | 3.31437  | 0.64691  | 2.42787  |
| O | 1.20702  | -2.81986 | 0.29839  |
| C | -1.81702 | 0.23309  | 1.52617  |
| C | 3.79291  | -1.62288 | 4.32150  |
| C | 2.36004  | -4.17698 | 2.75761  |
| C | 0.41268  | 3.21649  | -4.14619 |
| O | 1.21229  | 3.99030  | -3.61093 |
| C | 3.17588  | 4.15816  | -0.93846 |
| H | -0.38793 | -1.00474 | -0.18521 |
| H | 1.85794  | -0.47612 | -0.93709 |
| H | 1.81916  | 1.95501  | 0.93022  |
| H | 1.84335  | 1.73299  | -2.11899 |
| H | -0.35897 | 2.57467  | -0.13498 |
| H | -0.76221 | 3.96338  | -2.01590 |
| H | -1.90979 | 2.60061  | -2.05076 |
| H | 3.88824  | 1.29290  | 0.69943  |
| H | 1.54297  | 3.91087  | -2.22348 |
| H | -1.99890 | 0.65979  | 2.51264  |
| H | -1.97931 | -0.85031 | 1.55684  |
| H | -2.49727 | 0.68434  | 0.79630  |
| H | 3.87065  | -2.60329 | 4.79379  |
| H | 3.30738  | -0.93428 | 5.02208  |
| H | 4.80285  | -1.23462 | 4.15040  |
| H | 2.85393  | -4.39079 | 3.70692  |
| H | 2.81973  | -4.79203 | 1.97604  |
| H | 1.31316  | -4.49256 | 2.82716  |
| H | 0.43874  | 3.00852  | -5.21931 |
| H | 3.11865  | 5.20717  | -1.22691 |
| H | 3.91965  | 3.60541  | -1.50757 |
| H | 3.33324  | 4.04943  | 0.12970  |

**Compound 11m**

Methyl 6-O-methyl-2-deoxy-2-dimethylmaleimido- $\alpha$ -D-glucopyranoside

Methylated on O3

Energy = -1167.173536 Hartrees

|   |          |         |          |
|---|----------|---------|----------|
| C | 0.00000  | 0.00000 | 0.00000  |
| C | 1.55936  | 0.00000 | 0.00000  |
| C | 2.05056  | 1.46424 | 0.00000  |
| C | 1.43743  | 2.23471 | -1.17887 |
| C | -0.09757 | 2.08426 | -1.17549 |

|   |          |          |          |
|---|----------|----------|----------|
| C | -0.74607 | 2.63129  | -2.44836 |
| O | -0.46854 | 0.70538  | -1.12600 |
| O | -0.40151 | 0.54054  | 1.22546  |
| N | 2.06386  | -0.83084 | 1.13366  |
| O | 3.51380  | 1.41297  | -0.07520 |
| O | 1.80180  | 3.59369  | -1.02835 |
| O | -0.39483 | 4.00358  | -2.56628 |
| C | 3.04556  | -0.61452 | 2.03889  |
| C | 3.11282  | -1.70605 | 3.04245  |
| C | 2.21637  | -2.64384 | 2.66975  |
| C | 1.54384  | -2.15843 | 1.41984  |
| O | 3.86520  | 0.35101  | 2.03750  |
| O | 0.75114  | -2.73745 | 0.72378  |
| C | -1.80346 | 0.39083  | 1.51031  |
| C | 4.08421  | -1.65592 | 4.17358  |
| C | 1.86979  | -3.96706 | 3.25484  |
| C | -0.96349 | 4.64749  | -3.70970 |
| C | 4.29240  | 2.64440  | -0.26656 |
| H | -0.38630 | -1.01085 | -0.13906 |
| H | 1.88712  | -0.48217 | -0.92627 |
| H | 1.77638  | 1.97675  | 0.92904  |
| H | 1.83706  | 1.81384  | -2.11673 |
| H | -0.49183 | 2.62096  | -0.30343 |
| H | -1.83584 | 2.51138  | -2.37773 |
| H | -0.39288 | 2.06239  | -3.32189 |
| H | 1.21598  | 4.11557  | -1.61122 |
| H | -1.95693 | 0.80123  | 2.50841  |
| H | -2.08595 | -0.66859 | 1.49647  |
| H | -2.41277 | 0.94032  | 0.78663  |
| H | 4.02742  | -2.56142 | 4.77853  |
| H | 3.88533  | -0.79355 | 4.81960  |
| H | 5.10880  | -1.54682 | 3.80221  |
| H | 2.49930  | -4.20402 | 4.11354  |
| H | 1.97906  | -4.75744 | 2.50438  |
| H | 0.82124  | -3.98191 | 3.57408  |
| H | -2.05897 | 4.61176  | -3.66517 |
| H | -0.63296 | 5.68638  | -3.68395 |
| H | -0.61875 | 4.17349  | -4.63763 |
| H | 5.32439  | 2.34537  | -0.08106 |
| H | 3.96419  | 3.41151  | 0.43576  |
| H | 4.16562  | 2.99248  | -1.28771 |
| H | 3.80276  | 0.90747  | 1.06220  |

Methylated on O4

Energy = -1167.170588 Hartrees

|   |          |          |          |
|---|----------|----------|----------|
| C | 0.00000  | 0.00000  | 0.00000  |
| C | 1.54946  | 0.00000  | 0.00000  |
| C | 2.08786  | 1.45609  | 0.00000  |
| C | 1.46718  | 2.15580  | -1.20335 |
| C | -0.07095 | 2.09686  | -1.14897 |
| C | -0.73533 | 2.75837  | -2.35642 |
| O | -0.46425 | 0.73919  | -1.14780 |
| O | -0.44327 | 0.54493  | 1.19782  |
| N | 2.07438  | -0.81422 | 1.09593  |
| O | 3.49309  | 1.51747  | -0.13564 |
| O | 1.81978  | 3.61519  | -1.20276 |
| O | -0.25610 | 4.12242  | -2.37541 |
| C | 2.83562  | -0.45891 | 2.21202  |
| C | 3.03551  | -1.69535 | 3.04066  |
| C | 2.46071  | -2.73370 | 2.39943  |
| C | 1.83751  | -2.20801 | 1.14145  |
| O | 3.29822  | 0.65094  | 2.44545  |
| O | 1.22633  | -2.82028 | 0.28860  |
| C | -1.81879 | 0.27334  | 1.51610  |
| C | 3.79575  | -1.62872 | 4.32207  |
| C | 2.37675  | -4.18201 | 2.74279  |
| C | -0.73349 | 4.93827  | -3.46709 |
| C | 3.14555  | 4.02001  | -1.72799 |

|   |          |          |          |
|---|----------|----------|----------|
| H | -0.38859 | -1.00748 | -0.16864 |
| H | 1.86220  | -0.48088 | -0.93435 |
| H | 1.76393  | 1.96793  | 0.91248  |
| H | 1.85218  | 1.74383  | -2.14302 |
| H | -0.40608 | 2.60211  | -0.23256 |
| H | -1.82380 | 2.75079  | -2.24563 |
| H | -0.46019 | 2.24930  | -3.28869 |
| H | 3.85107  | 1.36308  | 0.76004  |
| H | 1.03133  | 4.06373  | -1.74441 |
| H | -1.99736 | 0.71358  | 2.49722  |
| H | -1.99455 | -0.80765 | 1.55889  |
| H | -2.49163 | 0.72480  | 0.77967  |
| H | 3.86931  | -2.60957 | 4.79462  |
| H | 3.31338  | -0.93753 | 5.02207  |
| H | 4.80759  | -1.24513 | 4.15105  |
| H | 2.87914  | -4.40148 | 3.68631  |
| H | 2.83012  | -4.79115 | 1.95304  |
| H | 1.33096  | -4.49971 | 2.81964  |
| H | -1.82444 | 4.99234  | -3.42440 |
| H | -0.31025 | 5.93238  | -3.32419 |
| H | -0.41071 | 4.51939  | -4.42551 |
| H | 3.19336  | 5.09817  | -1.58184 |
| H | 3.20592  | 3.74992  | -2.78428 |
| H | 3.88685  | 3.49204  | -1.13625 |

### Compound 12f

Methyl 6-*O*-formyl-2-deoxy-2-dimethylmaleimido- $\beta$ -D-glucopyranoside

#### Methylated on O3

Energy = -1241.195251 Hartrees

|   |          |          |          |
|---|----------|----------|----------|
| C | 0.00000  | 0.00000  | 0.00000  |
| C | 1.55820  | 0.00000  | 0.00000  |
| C | 1.98100  | 1.48719  | 0.00000  |
| C | 1.46994  | 2.13506  | -1.29775 |
| C | -0.06584 | 1.92418  | -1.38300 |
| C | -0.71356 | 2.45588  | -2.65600 |
| O | -0.40809 | 0.54738  | -1.24382 |
| O | -0.47103 | -1.28186 | 0.13380  |
| N | 2.11188  | -0.82796 | 1.09176  |
| O | 3.41413  | 1.52822  | 0.20060  |
| O | 1.75623  | 3.51526  | -1.25298 |
| O | -0.16779 | 1.89615  | -3.87633 |
| C | 2.78256  | -0.52185 | 2.21231  |
| C | 2.95559  | -1.70148 | 3.09099  |
| C | 2.52124  | -2.77701 | 2.39470  |
| C | 2.06189  | -2.29664 | 1.04753  |
| O | 3.30824  | 0.61603  | 2.47124  |
| O | 1.81600  | -2.92356 | 0.05872  |
| C | -1.90318 | -1.39212 | 0.22493  |
| C | 3.58826  | -1.58537 | 4.43826  |
| C | 2.51337  | -4.22683 | 2.72537  |
| C | 0.81503  | 2.56689  | -4.48836 |
| O | 1.39513  | 3.53897  | -4.04481 |
| C | 4.14883  | 2.78326  | 0.02816  |
| H | -0.38125 | 0.64649  | 0.81705  |
| H | 1.87752  | -0.48083 | -0.92910 |
| H | 1.51760  | 2.02487  | 0.84114  |
| H | 1.96391  | 1.64550  | -2.14804 |
| H | -0.51424 | 2.50545  | -0.55907 |
| H | -0.63619 | 3.54431  | -2.68951 |
| H | -1.76324 | 2.16004  | -2.66291 |
| H | 1.70841  | 3.85309  | -2.16861 |
| H | 3.43426  | 1.13842  | 1.54778  |
| H | -2.10920 | -2.44383 | 0.42145  |

|   |          |          |          |
|---|----------|----------|----------|
| H | -2.37316 | -1.09047 | -0.71390 |
| H | -2.28387 | -0.77781 | 1.05117  |
| H | 3.71411  | -2.56663 | 4.89750  |
| H | 2.97527  | -0.96867 | 5.10525  |
| H | 4.56914  | -1.10360 | 4.36806  |
| H | 3.00352  | -4.42804 | 3.67879  |
| H | 3.01309  | -4.79926 | 1.93650  |
| H | 1.48318  | -4.59949 | 2.77579  |
| H | 1.03430  | 2.10808  | -5.45983 |
| H | 5.13053  | 2.58658  | 0.46020  |
| H | 3.64257  | 3.59884  | 0.54668  |
| H | 4.23712  | 3.01211  | -1.03099 |

#### Methylated on O4

Energy = -1241.195200 Hartrees

|   |          |          |          |
|---|----------|----------|----------|
| C | 0.00000  | 0.00000  | 0.00000  |
| C | 1.54140  | 0.00000  | 0.00000  |
| C | 2.12812  | 1.43839  | 0.00000  |
| C | 1.46813  | 2.23259  | -1.11932 |
| C | -0.06697 | 2.17195  | -0.97415 |
| C | -0.89870 | 3.02182  | -1.93138 |
| O | -0.44322 | 0.82103  | -1.11304 |
| O | -0.42387 | -1.28689 | -0.19547 |
| N | 2.11153  | -0.77019 | 1.09009  |
| O | 3.52272  | 1.41507  | -0.25385 |
| O | 1.83241  | 3.68652  | -1.10193 |
| O | -0.64246 | 2.79316  | -3.35096 |
| C | 1.81374  | -0.60399 | 2.45463  |
| C | 2.36148  | -1.79795 | 3.17851  |
| C | 2.89906  | -2.63953 | 2.26751  |
| C | 2.73621  | -2.03098 | 0.90586  |
| O | 1.22031  | 0.35579  | 2.91744  |
| O | 3.07702  | -2.47480 | -0.16862 |
| C | -1.83272 | -1.50963 | -0.01544 |
| C | 2.25066  | -1.90233 | 4.66243  |
| C | 3.57097  | -3.96105 | 2.42668  |
| C | 0.29275  | 3.48811  | -3.95521 |
| O | 1.12152  | 4.21795  | -3.40322 |
| C | 3.22495  | 4.15055  | -0.85576 |
| H | -0.41486 | 0.43769  | 0.92244  |
| H | 1.85995  | -0.50647 | -0.91829 |
| H | 1.91244  | 1.91503  | 0.96730  |
| H | 1.79979  | 1.84181  | -2.08620 |
| H | -0.32803 | 2.55179  | 0.02968  |
| H | -0.77962 | 4.08784  | -1.72244 |
| H | -1.94451 | 2.74179  | -1.80898 |
| H | 3.93495  | 0.73474  | 0.29935  |
| H | 1.50833  | 4.03836  | -2.04750 |
| H | -1.97805 | -2.58661 | -0.09486 |
| H | -2.40818 | -1.00166 | -0.79437 |
| H | -2.15255 | -1.16536 | 0.97592  |
| H | 2.69685  | -2.82605 | 5.03451  |
| H | 1.20026  | -1.87127 | 4.97260  |
| H | 2.74464  | -1.05371 | 5.14847  |
| H | 3.62474  | -4.26390 | 3.47363  |
| H | 4.58666  | -3.92846 | 2.01698  |
| H | 3.03435  | -4.73302 | 1.86389  |
| H | 0.26996  | 3.35401  | -5.04009 |
| H | 3.18470  | 5.22355  | -1.03724 |
| H | 3.90347  | 3.63695  | -1.53395 |
| H | 3.46061  | 3.92956  | 0.18010  |

### Compound 12m

Methyl 6-*O*-methyl-2-deoxy-2-dimethylmaleimido- $\beta$ -D-glucopyranoside

Methylated on O3

Energy = -1167.162157 Hartrees

|   |          |          |          |
|---|----------|----------|----------|
| C | 0.00000  | 0.00000  | 0.00000  |
| C | 1.55811  | 0.00000  | 0.00000  |
| C | 1.97016  | 1.48779  | 0.00000  |
| C | 1.46308  | 2.14224  | -1.29537 |
| C | -0.06421 | 1.89462  | -1.43619 |
| C | -0.59133 | 2.27241  | -2.82197 |
| O | -0.39892 | 0.51985  | -1.25809 |
| O | -0.47399 | -1.27855 | 0.15886  |
| N | 2.11681  | -0.82257 | 1.09266  |
| O | 3.40351  | 1.54255  | 0.20800  |
| O | 1.72059  | 3.52899  | -1.20423 |
| O | -0.25168 | 3.63024  | -3.06711 |
| C | 2.78146  | -0.51005 | 2.21530  |
| C | 2.95955  | -1.68827 | 3.09549  |
| C | 2.53054  | -2.76655 | 2.40042  |
| C | 2.06830  | -2.29006 | 1.05298  |
| O | 3.29780  | 0.63141  | 2.47535  |
| O | 1.81934  | -2.92090 | 0.06709  |
| C | -1.90521 | -1.38253 | 0.26540  |
| C | 3.59199  | -1.56822 | 4.44249  |
| C | 2.52983  | -4.21603 | 2.73265  |
| C | -0.71600 | 4.12203  | -4.32739 |
| C | 4.12174  | 2.80482  | 0.02187  |
| H | -0.38367 | 0.66364  | 0.80108  |
| H | 1.87776  | -0.48165 | -0.92843 |
| H | 1.49785  | 2.02180  | 0.83794  |
| H | 1.98798  | 1.68934  | -2.15211 |
| H | -0.56794 | 2.51062  | -0.67477 |
| H | -1.68063 | 2.13147  | -2.84447 |
| H | -0.14164 | 1.61423  | -3.58077 |
| H | 1.20615  | 3.96273  | -1.91231 |
| H | 3.42323  | 1.15595  | 1.54992  |
| H | -2.11325 | -2.43126 | 0.47570  |
| H | -2.38404 | -1.08944 | -0.67179 |
| H | -2.27566 | -0.75771 | 1.08839  |
| H | 3.72227  | -2.54860 | 4.90248  |
| H | 2.97680  | -0.95344 | 5.10919  |
| H | 4.57080  | -1.08232 | 4.37132  |
| H | 3.02359  | -4.41326 | 3.68488  |
| H | 3.03002  | -4.78718 | 1.94319  |
| H | 1.50156  | -4.59339 | 2.78666  |
| H | -1.80985 | 4.06143  | -4.38405 |
| H | -0.40653 | 5.16572  | -4.39218 |
| H | -0.27365 | 3.55409  | -5.15582 |
| H | 5.12251  | 2.61032  | 0.40835  |
| H | 3.63120  | 3.60838  | 0.57397  |
| H | 4.15811  | 3.05095  | -1.03656 |

Methylated on O4

Energy = -1167.165589 Hartrees

|   |          |          |          |
|---|----------|----------|----------|
| C | 0.00000  | 0.00000  | 0.00000  |
| C | 1.54342  | 0.00000  | 0.00000  |
| C | 2.10953  | 1.44466  | 0.00000  |
| C | 1.46287  | 2.22197  | -1.13426 |
| C | -0.07548 | 2.14516  | -1.04205 |
| C | -0.77600 | 2.89232  | -2.17852 |
| O | -0.44387 | 0.79031  | -1.13786 |
| O | -0.42865 | -1.28966 | -0.16160 |
| N | 2.11174  | -0.76243 | 1.09675  |
| O | 3.51191  | 1.45809  | -0.21767 |
| O | 1.81330  | 3.67920  | -1.05116 |
| O | -0.28465 | 4.25133  | -2.13306 |
| C | 1.81352  | -0.59196 | 2.45959  |

|   |          |          |          |
|---|----------|----------|----------|
| C | 2.38923  | -1.76813 | 3.19160  |
| C | 2.94237  | -2.60494 | 2.28603  |
| C | 2.76105  | -2.01088 | 0.91977  |
| O | 1.19999  | 0.35707  | 2.91830  |
| O | 3.10461  | -2.45870 | -0.15229 |
| C | -1.83511 | -1.50513 | 0.04276  |
| C | 2.28452  | -1.86208 | 4.67656  |
| C | 3.64089  | -3.91175 | 2.45347  |
| C | -0.80042 | 5.13879  | -3.14957 |
| C | 3.14292  | 4.11474  | -1.53726 |
| H | -0.41285 | 0.46437  | 0.90967  |
| H | 1.86686  | -0.51094 | -0.91397 |
| H | 1.86048  | 1.93016  | 0.95368  |
| H | 1.81917  | 1.86662  | -2.10725 |
| H | -0.39276 | 2.58024  | -0.08002 |
| H | -1.85963 | 2.88705  | -2.02784 |
| H | -0.53939 | 2.43743  | -3.14841 |
| H | 3.93667  | 0.84922  | 0.40437  |
| H | 1.01514  | 4.15893  | -1.55779 |
| H | -1.98447 | -2.58302 | -0.01402 |
| H | -2.42094 | -1.01027 | -0.73698 |
| H | -2.13968 | -1.14113 | 1.03180  |
| H | 2.76392  | -2.76580 | 5.05596  |
| H | 1.23415  | -1.86604 | 4.98864  |
| H | 2.74809  | -0.99147 | 5.15339  |
| H | 3.73626  | -4.18754 | 3.50506  |
| H | 4.64025  | -3.87437 | 2.00607  |
| H | 3.09642  | -4.70614 | 1.93029  |
| H | -1.88764 | 5.20029  | -3.05353 |
| H | -0.35899 | 6.11784  | -2.96426 |
| H | -0.52562 | 4.77724  | -4.14553 |
| H | 3.17175  | 5.18999  | -1.36707 |
| H | 3.23395  | 3.86771  | -2.59682 |
| H | 3.88229  | 3.58824  | -0.94111 |

**Compound 14a E**

Methyl 4,6-*O*-ethylidene- $\alpha$ -D-allopyranoside

Methylated on O2

Energy = -843.590921 Hartrees

|   |          |          |          |
|---|----------|----------|----------|
| C | 0.00000  | 0.00000  | 0.00000  |
| C | 1.55916  | 0.00000  | 0.00000  |
| C | 2.23243  | 1.38198  | 0.00000  |
| C | 1.48256  | 2.27037  | -0.99952 |
| C | -0.01378 | 2.28320  | -0.68348 |
| C | -0.70043 | 3.25852  | -1.63499 |
| O | -0.52841 | 0.94873  | -0.86719 |
| O | -0.35190 | 0.18628  | 1.36511  |
| O | 1.86776  | -0.75485 | 1.25260  |
| O | 2.16744  | 1.90465  | 1.31513  |
| O | 2.01275  | 3.57672  | -0.89077 |
| O | -0.05962 | 4.52317  | -1.46676 |
| C | -1.72438 | -0.13085 | 1.70039  |
| C | 1.31844  | 4.50280  | -1.76135 |
| C | 1.89421  | 5.87942  | -1.54436 |
| C | 3.24318  | -0.83627 | 1.80531  |
| H | -0.37942 | -0.96595 | -0.35405 |
| H | 1.93087  | -0.61869 | -0.81803 |
| H | 3.28006  | 1.28343  | -0.32036 |
| H | 1.62673  | 1.87514  | -2.01976 |
| H | -0.17805 | 2.60596  | 0.34878  |
| H | -1.75431 | 3.39978  | -1.38990 |
| H | -0.61921 | 2.90808  | -2.67503 |
| H | 1.13665  | -0.43814 | 1.87427  |
| H | 2.34151  | 2.85923  | 1.26400  |

|   |          |          |          |   |          |          |          |
|---|----------|----------|----------|---|----------|----------|----------|
| H | -1.83194 | 0.07895  | 2.76383  | O | -0.17242 | 4.43021  | -1.63648 |
| H | -1.92878 | -1.18778 | 1.49898  | C | -1.83141 | -1.51422 | -0.17762 |
| H | -2.40106 | 0.50299  | 1.12379  | C | 1.22879  | 4.51495  | -1.76538 |
| H | 1.46531  | 4.14319  | -2.79399 | C | 1.67012  | 5.92592  | -1.46880 |
| H | 1.40565  | 6.58917  | -2.21558 | C | 1.70484  | -1.89546 | 1.83041  |
| H | 2.96674  | 5.87387  | -1.75164 | H | -0.39740 | 0.40944  | 0.94791  |
| H | 1.72581  | 6.19657  | -0.51203 | H | 1.91457  | -0.63546 | -0.80436 |
| H | 3.85764  | -1.26790 | 1.01715  | H | 3.23534  | 1.34991  | -0.22468 |
| H | 3.16551  | -1.51813 | 2.65047  | H | 1.71897  | 1.93636  | -2.02355 |
| H | 3.56326  | 0.16134  | 2.09879  | H | -0.37024 | 2.51712  | 0.14045  |

#### Methylated on O3

Energy = -843.597910 Hartrees

|   |          |          |          |
|---|----------|----------|----------|
| C | 0.00000  | 0.00000  | 0.00000  |
| C | 1.55570  | 0.00000  | 0.00000  |
| C | 2.04230  | 1.45145  | 0.00000  |
| C | 1.43013  | 2.18599  | -1.17869 |
| C | -0.10232 | 2.08787  | -1.15131 |
| C | -0.63143 | 2.77626  | -2.40741 |
| O | -0.51672 | 0.71107  | -1.09399 |
| O | -0.37854 | 0.57698  | 1.25950  |
| O | 2.11709  | -0.62927 | 1.13253  |
| O | 1.55567  | 2.08761  | 1.27561  |
| O | 1.82762  | 3.53469  | -1.21541 |
| O | -0.13027 | 4.11232  | -2.38554 |
| C | -1.79110 | 0.54322  | 1.58628  |
| C | 1.27930  | 4.19532  | -2.38119 |
| C | 1.69005  | 5.64543  | -2.34145 |
| C | 2.52539  | 2.25660  | 2.37672  |
| H | -0.41261 | -1.01122 | -0.07338 |
| H | 1.88471  | -0.46709 | -0.93641 |
| H | 3.12947  | 1.53210  | 0.03307  |
| H | 1.79042  | 1.65491  | -2.07833 |
| H | -0.48656 | 2.63345  | -0.28209 |
| H | -1.72054 | 2.84285  | -2.41099 |
| H | -0.30298 | 2.24096  | -3.31094 |
| H | 2.03695  | -1.59143 | 1.07511  |
| H | 0.68551  | 1.57203  | 1.53269  |
| H | -1.88737 | 0.99483  | 2.57291  |
| H | -2.12300 | -0.49785 | 1.62042  |
| H | -2.36857 | 1.10342  | 0.84827  |
| H | 1.67500  | 3.66974  | -3.26745 |
| H | 1.30550  | 6.15838  | -3.22574 |
| H | 2.77947  | 5.72546  | -2.32925 |
| H | 1.28175  | 6.12418  | -1.44789 |
| H | 2.92427  | 1.28157  | 2.65323  |
| H | 1.96640  | 2.71854  | 3.18900  |
| H | 3.29189  | 2.93523  | 2.00708  |

#### **Compound 14β E**

Methyl 4,6-*O*-ethylidene-β-D-allopyranoside

#### Methylated on O2

Energy = -843.588394 Hartrees

|   |          |          |          |
|---|----------|----------|----------|
| C | 0.00000  | 0.00000  | 0.00000  |
| C | 1.54280  | 0.00000  | 0.00000  |
| C | 2.16307  | 1.40534  | 0.00000  |
| C | 1.45153  | 2.29464  | -1.01424 |
| C | -0.06859 | 2.19268  | -0.86406 |
| C | -0.70406 | 3.12751  | -1.88894 |
| O | -0.43271 | 0.82279  | -1.07244 |
| O | -0.40228 | -1.30467 | -0.20098 |
| O | 2.11177  | -0.58181 | 1.26901  |
| O | 1.97683  | 1.85286  | 1.35183  |
| O | 1.88477  | 3.62571  | -0.82665 |

|   |          |          |          |
|---|----------|----------|----------|
| O | -0.17242 | 4.43021  | -1.63648 |
| C | -1.83141 | -1.51422 | -0.17762 |
| C | 1.22879  | 4.51495  | -1.76538 |
| C | 1.67012  | 5.92592  | -1.46880 |
| C | 1.70484  | -1.89546 | 1.83041  |
| H | -0.39740 | 0.40944  | 0.94791  |
| H | 1.91457  | -0.63546 | -0.80436 |
| H | 3.23534  | 1.34991  | -0.22468 |
| H | 1.71897  | 1.93636  | -2.02355 |
| H | -0.37024 | 2.51712  | 0.14045  |
| H | -1.78637 | 3.19751  | -1.77070 |
| H | -0.47531 | 2.79655  | -2.91298 |
| H | 2.14929  | 0.18460  | 1.90762  |
| H | 2.29192  | 2.76601  | 1.44505  |
| H | -1.97525 | -2.59138 | -0.25383 |
| H | -2.30411 | -1.01228 | -1.02398 |
| H | -2.25705 | -1.14659 | -0.76428 |
| H | 1.52281  | 4.18499  | -2.77622 |
| H | 1.21118  | 6.61036  | -2.18562 |
| H | 2.75685  | 6.00327  | -1.54885 |
| H | 1.35910  | 6.21039  | -0.46036 |
| H | 0.68763  | -1.83038 | 2.20936  |
| H | 2.43520  | -2.10044 | 2.61141  |
| H | 1.77947  | -2.60685 | 1.01230  |

#### Methylated on O3

Energy = -843.591977 Hartrees

|   |          |          |          |
|---|----------|----------|----------|
| C | 0.00000  | 0.00000  | 0.00000  |
| C | 1.54428  | 0.00000  | 0.00000  |
| C | 2.13913  | 1.41446  | 0.00000  |
| C | 1.38971  | 2.34586  | -0.93041 |
| C | -0.13399 | 2.20942  | -0.77787 |
| C | -0.78738 | 3.15784  | -1.78084 |
| O | -0.48858 | 0.85262  | -1.03041 |
| O | -0.36978 | -1.30855 | -0.21770 |
| O | 2.06242  | -0.59286 | 1.19563  |
| O | 1.98854  | 1.84395  | 1.44766  |
| O | 1.80754  | 3.68288  | -0.75399 |
| O | -0.26655 | 4.46533  | -1.53137 |
| C | -1.77862 | -1.58669 | -0.08145 |
| C | 1.12568  | 4.56110  | -1.69247 |
| C | 1.56560  | 5.97706  | -1.41854 |
| C | 2.92972  | 2.86686  | 1.98387  |
| H | -0.38811 | 0.36742  | 0.97023  |
| H | 1.88723  | -0.53527 | -0.89193 |
| H | 3.21728  | 1.40796  | -0.18121 |
| H | 1.64689  | 1.99150  | -1.94560 |
| H | -0.43853 | 2.50722  | 0.23587  |
| H | -1.86805 | 3.21325  | -1.64450 |
| H | -0.57225 | 2.83603  | -2.81043 |
| H | 1.64980  | -1.45917 | 1.34183  |
| H | 2.05423  | 0.96664  | 1.93162  |
| H | -1.88148 | -2.66517 | -0.19382 |
| H | -2.34615 | -1.07390 | -0.86108 |
| H | -2.13427 | -1.28031 | 0.90976  |
| H | 1.40596  | 4.22078  | -2.70364 |
| H | 1.09195  | 6.65017  | -2.13646 |
| H | 2.65035  | 6.06106  | -1.51783 |
| H | 1.26574  | 6.27418  | -0.41018 |
| H | 3.94622  | 2.47868  | 1.90863  |
| H | 2.62376  | 3.02130  | 3.01712  |
| H | 2.77472  | 3.75164  | 1.37306  |

### Compound 1e

Methyl 4,6-*O*-ethylidene-2-deoxy-2-dimethylmaleimido- $\alpha$ -D-glucopyranoside

#### Methylated on O3

Energy = -1205.282240 Hartrees

|   |          |          |          |
|---|----------|----------|----------|
| C | 0.00000  | 0.00000  | 0.00000  |
| C | 1.56590  | 0.00000  | 0.00000  |
| C | 2.08820  | 1.46078  | 0.00000  |
| C | 1.46045  | 2.18257  | -1.19454 |
| C | -0.06834 | 2.10943  | -1.08094 |
| C | -0.67896 | 2.86006  | -2.26090 |
| O | -0.48839 | 0.74823  | -1.09100 |
| O | -0.39189 | 0.48877  | 1.25094  |
| N | 2.05919  | -0.84530 | 1.12840  |
| O | 3.54430  | 1.38943  | -0.06020 |
| O | 1.84645  | 3.54757  | -1.21749 |
| O | -0.16922 | 4.19272  | -2.23911 |
| C | 3.01864  | -0.64183 | 2.05421  |
| C | 3.06277  | -1.73739 | 3.05323  |
| C | 2.17207  | -2.67105 | 2.65591  |
| C | 1.52863  | -2.17720 | 1.39423  |
| O | 3.84722  | 0.32143  | 2.07719  |
| O | 0.75460  | -2.74878 | 0.67327  |
| C | -1.79595 | 0.34355  | 1.53180  |
| C | 4.01093  | -1.69808 | 4.20448  |
| C | 1.81133  | -3.99759 | 3.22441  |
| C | 1.67222  | 5.69352  | -2.26660 |
| C | 1.23455  | 4.25000  | -2.32270 |
| C | 4.31887  | 2.62611  | -0.20477 |
| H | -0.38034 | -1.00792 | -0.17383 |
| H | 1.89337  | -0.48158 | -0.92663 |
| H | 1.80999  | 1.98486  | 0.92257  |
| H | 1.77900  | 1.68066  | -2.12415 |
| H | -0.37842 | 2.60138  | -0.15146 |
| H | -1.76429 | 2.93108  | -2.17291 |
| H | -0.43073 | 2.35776  | -3.20818 |
| H | 3.81386  | 0.86473  | 1.12765  |
| H | -1.94189 | 0.70854  | 2.54851  |
| H | -2.09161 | -0.71050 | 1.46870  |
| H | -2.39889 | 0.93400  | 0.83597  |
| H | 3.93294  | -2.60457 | 4.80561  |
| H | 3.80611  | -0.83578 | 4.84870  |
| H | 5.04429  | -1.59817 | 3.85536  |
| H | 2.41352  | -4.23604 | 4.10203  |
| H | 1.94799  | -4.78449 | 2.47452  |
| H | 0.75281  | -4.01737 | 3.50857  |
| H | 1.22642  | 6.24133  | -3.10000 |
| H | 2.76033  | 5.76359  | -2.33904 |
| H | 1.34161  | 6.14635  | -1.32846 |
| H | 1.56331  | 3.74845  | -3.25010 |
| H | 5.34184  | 2.34495  | 0.04676  |
| H | 3.94126  | 3.39101  | 0.47622  |
| H | 4.25564  | 2.97251  | -1.23265 |

|   |          |          |          |
|---|----------|----------|----------|
| C | 2.00939  | 1.48489  | 0.00000  |
| C | 1.48712  | 2.09602  | -1.30432 |
| C | -0.04890 | 1.93527  | -1.33115 |
| C | -0.57312 | 2.55469  | -2.62334 |
| O | -0.42016 | 0.56704  | -1.23280 |
| O | -0.46376 | -1.28611 | 0.11911  |
| N | 2.10712  | -0.83177 | 1.09257  |
| O | 3.43994  | 1.51066  | 0.20929  |
| O | 1.78671  | 3.47873  | -1.38389 |
| O | -0.14366 | 3.91526  | -2.65376 |
| C | 2.75601  | -0.52962 | 2.22483  |
| C | 2.90343  | -1.70823 | 3.10895  |
| C | 2.47545  | -2.78261 | 2.40615  |
| C | 2.04916  | -2.30226 | 1.04773  |
| O | 3.28444  | 0.60695  | 2.49492  |
| O | 1.82435  | -2.92727 | 0.05291  |
| C | -1.89504 | -1.40266 | 0.22746  |
| C | 3.50891  | -1.59376 | 4.46890  |
| C | 2.44931  | -4.23100 | 2.74187  |
| C | 1.59464  | 5.53344  | -2.59854 |
| C | 1.25562  | 4.06269  | -2.59531 |
| C | 4.16041  | 2.77010  | 0.03354  |
| H | -0.37736 | 0.63301  | 0.82876  |
| H | 1.88291  | -0.48430 | -0.92699 |
| H | 1.54614  | 2.03246  | 0.83471  |
| H | 1.92793  | 1.55887  | -2.16050 |
| H | -0.46633 | 2.50376  | -0.48579 |
| H | -1.66397 | 2.56328  | -2.64875 |
| H | -0.19949 | 2.00069  | -3.49751 |
| H | 3.43460  | 1.12429  | 1.58272  |
| H | -2.09539 | -2.45928 | 0.40245  |
| H | -2.37863 | -1.08003 | -0.69730 |
| H | -2.26521 | -0.80836 | 1.07282  |
| H | 3.60446  | -2.57398 | 4.93720  |
| H | 2.89408  | -0.95976 | 5.11792  |
| H | 4.50100  | -1.13267 | 4.41682  |
| H | 2.91973  | -4.43231 | 3.70521  |
| H | 2.95897  | -4.81101 | 1.96499  |
| H | 1.41515  | -4.59481 | 2.77473  |
| H | 1.20844  | 5.99421  | -3.51054 |
| H | 2.67785  | 5.67271  | -2.56249 |
| H | 1.13740  | 6.02214  | -1.73440 |
| H | 1.71317  | 3.52469  | -3.44404 |
| H | 5.14861  | 2.58925  | 0.45731  |
| H | 3.64958  | 3.57992  | 0.55914  |
| H | 4.23494  | 3.00238  | -1.02626 |

### Compound 2e

Methyl 4,6-*O*-ethylidene-2-deoxy-2-dimethylmaleimido- $\beta$ -D-glucopyranoside

#### Methylated on O3

Energy = -1205.270697 Hartrees

|   |         |         |         |
|---|---------|---------|---------|
| C | 0.00000 | 0.00000 | 0.00000 |
| C | 1.56329 | 0.00000 | 0.00000 |
